# Supplementary material
Source: PubMed Central journal article supplement (PMC6686697)
Supplement: Supp_Fig1.pdf [file Supp_Fig1.pdf]

## Supplementary Data

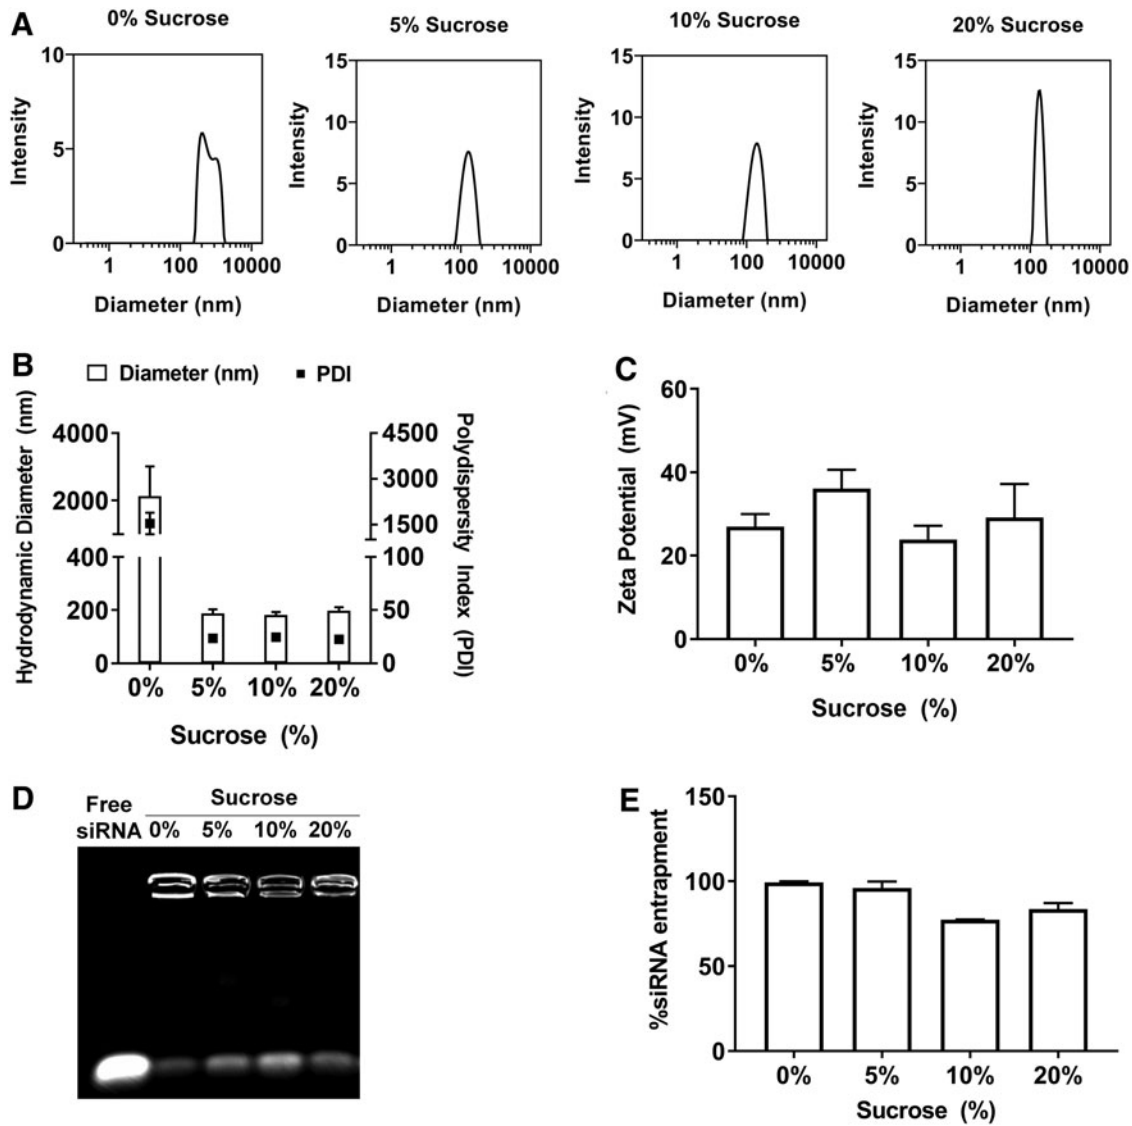

**SUPPLEMENTARY FIG. S1.** RGD-PEG-ECO/si $\beta$ 3 nanoparticles containing 0%, 5%, 10%, and 20% sucrose were flash-frozen and stored in  $-80^{\circ}\text{C}$  for 12 months. (A) Representative intensity peaks of long-term stored RGD-PEG-ECO/si $\beta$ 3 nanoparticles containing various concentrations of sucrose in nuclease-free water. Comparison of the hydrodynamic diameters, polydispersity indexes (B), and zeta potential (C) of RGD-PEG-ECO/si $\beta$ 3 nanoparticles stored for 0%, 5%, 10%, and 20% sucrose in nuclease-free water. (D) Agarose gel retardation of RGD-PEG-ECO/si $\beta$ 3 nanoparticles stored for 12 months compared to free si $\beta$ 3. (E) RiboGreen assay quantifying siRNA entrapment of RGD-PEG-ECO/si $\beta$ 3 nanoparticles containing stored for 12 months (error bars denote standard error of the mean,  $*P < 0.05$ ). PEG, polyethylene glycol.
